# Supplementary material for: Revisiting thiophosphate Pb3P2S8: a multifunctional material combining a nonlinear optical response and photocurrent response
Source: Royal Society of Chemistry journal article supplement (doi:10.1039/d1cp03624f), 2021-01-01
Supplement: d1cp03624f1.pdf [file d1cp03624f1.pdf]

## Revisiting Thiophosphate $\text{Pb}_3\text{P}_2\text{S}_8$ : A Multifunctional Material Combining a Nonlinear Optical Response and Photocurrent Response

Bingheng Ji <sup>a</sup>, Elizabeth Guderjahn <sup>a</sup>, Kui Wu <sup>b</sup>, Tajamul Syed <sup>c</sup>, Wei Wei <sup>c</sup>, Bingbing Zhang,<sup>b\*</sup>

Jian Wang <sup>a\*</sup>

<sup>a</sup> *Department of Chemistry and Biochemistry, Wichita State University, Wichita, Kansas 67260, United States*

<sup>b</sup> *College of Chemistry and Environmental Science, Hebei University, Key Laboratory of Analytical Science and Technology of Hebei Province, Baoding 071002, China*

<sup>c</sup> *Department of Mechanical Engineering, Wichita State University, Wichita, Kansas 67260, United States*

### Supporting information

1. Single crystal X-ray diffraction experimental details.
2. **Figure S1.** Kubelka-Munk Diffuse reflectance solid-state UV-Vis spectra of  $\text{Pb}_3\text{P}_2\text{S}_8$ .
3. **Table S1.** Selected crystal data and structure refinement parameters for  $\text{Pb}_3\text{P}_2\text{S}_8$  at 300 K.
4. **Table S2.** The measured LDT of  $\text{Pb}_3\text{P}_2\text{S}_8$  compared with AGS.
5. **Figure S2.** Calculated HSE bandgap of  $\text{Pb}_3\text{P}_2\text{S}_8$ .
6. **Figure S3.** Calculated charge density of the bottom of conduction band (left) and the top of the valence band (right).

**Single Crystal X-ray Diffraction:** Data collections were performed at room temperature for  $\text{Pb}_3\text{P}_2\text{S}_8$  using a Bruker Kappa APEX II diffractometer with graphite monochromated Mo- $K\alpha$  radiation ( $\lambda = 0.71073 \text{ \AA}$ ). Data reduction and integration, together with global unit cell refinements, were performed in the APEX2 software.<sup>1</sup> Multi-scan absorption corrections were applied.<sup>1</sup> The structures were solved by direct methods and refined by full matrix least-squares methods on  $F^2$  using the SHELX package with anisotropic displacement parameters for all atoms.<sup>2</sup> In the last refinement cycles, the atomic positions for the three compounds were standardized using the program Structure TIDY.<sup>2-3</sup>

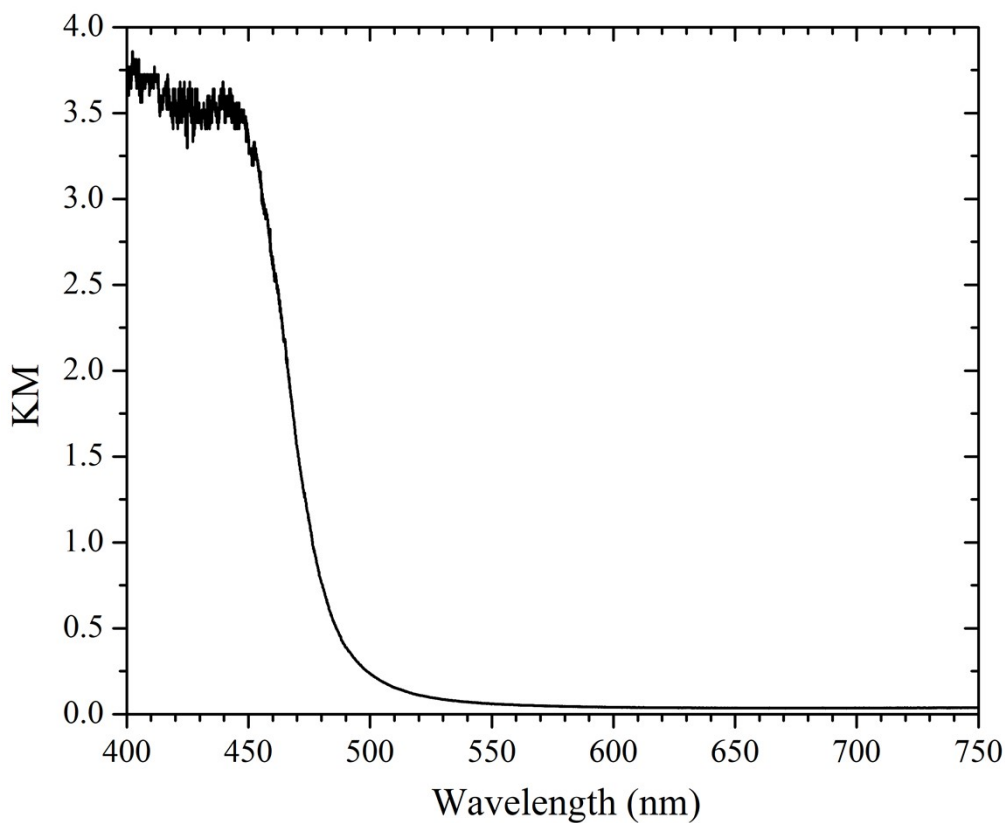

**Figure S1.** Kubelka-Munk Diffuse reflectance solid-state UV-Vis spectra of  $\text{Pb}_3\text{P}_2\text{S}_8$ .

**Table S1.** Selected crystal data and structure refinement parameters for Pb<sub>3</sub>P<sub>2</sub>S<sub>8</sub> at 300 K

| Empirical formula        |                           | Pb <sub>3</sub> P <sub>2</sub> S <sub>8</sub> |                          |
|--------------------------|---------------------------|-----------------------------------------------|--------------------------|
| Formula weight           | 939.99 g/mol              | Unit cell volume                              | 1304.1(4)Å <sup>3</sup>  |
| Temperature              | 300(2) K                  | Z                                             | 4                        |
| Radiation,<br>wavelength | Mo-Kα, 0.71073 Å          | Density ( <i>calc.</i> )                      | 4.788 g/cm <sup>3</sup>  |
| Crystal system           | Cubic                     | Absorption<br>coefficient                     | 40.133 mm <sup>-1</sup>  |
| Space group              | P2 <sub>1</sub> 3(No.198) | Final R indices <sup>a</sup>                  | R <sub>1</sub> = 0.0451  |
| Unit cell<br>dimensions  | a = 10.9253(10) Å         | [I > 2σ(I)]                                   | wR <sub>2</sub> = 0.1066 |
|                          |                           | Final R indices <sup>a</sup>                  | R <sub>1</sub> = 0.0891  |
|                          |                           | [all data]                                    | wR <sub>2</sub> = 0.1841 |
|                          |                           | G.O.F                                         | 1.116                    |

$$R_1 = \sum ||F_o| - |F_c|| / \sum |F_o|; \quad wR_2 = [\sum [w(F_o^2 - F_c^2)^2] / \sum [w(F_o^2)^2]]^{1/2}, \quad \text{and } w = 1 / [\sigma^2 F_o^2 + (A \cdot P)^2 + B \cdot P], \quad P = (F_o^2 + 2F_c^2) / 3; \quad A \text{ and } B \text{ are weight coefficients}$$

**Table S2.** The measured LDT of Pb<sub>3</sub>P<sub>2</sub>S<sub>8</sub> compared with AGS.

| Compounds                                     | Damage energy<br>(mJ) | Spot diameter<br>(mm) | LDT<br>(MV/cm <sup>2</sup> ) | LDT (×AGS) |
|-----------------------------------------------|-----------------------|-----------------------|------------------------------|------------|
| AgGaS <sub>2</sub>                            | 0.58                  | 0.5                   | 29.6                         | 1          |
| Pb <sub>3</sub> P <sub>2</sub> S <sub>8</sub> | 1.42                  | 0.5                   | 77.2                         | 2.6        |

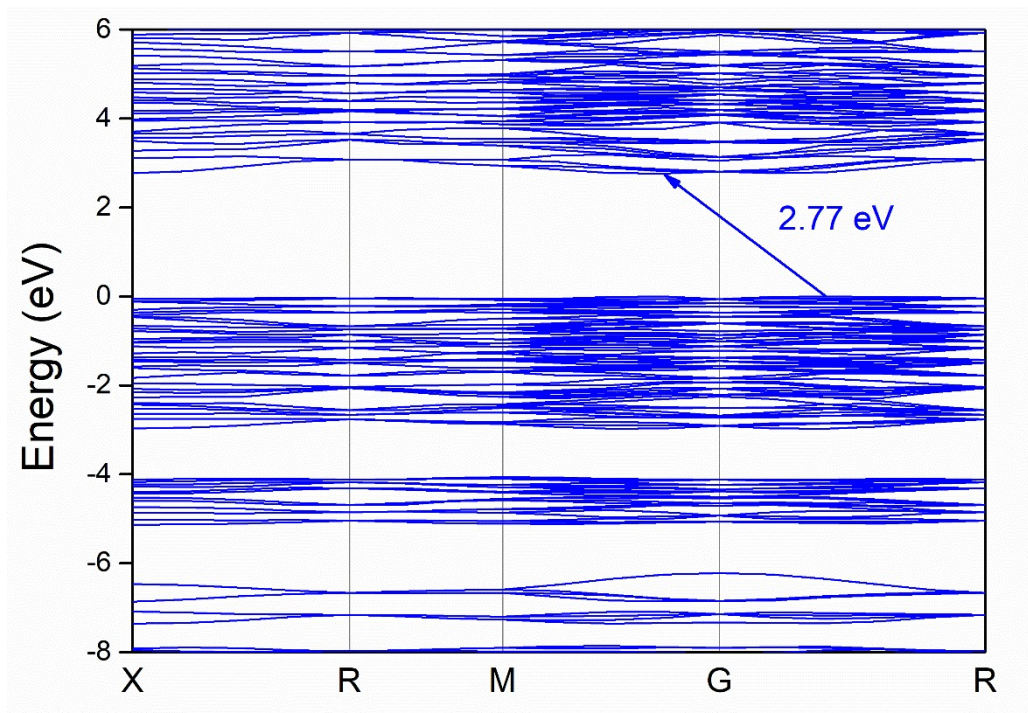

**Figure S2.** Calculated HSE bandgap of Pb<sub>3</sub>P<sub>2</sub>S<sub>8</sub>.

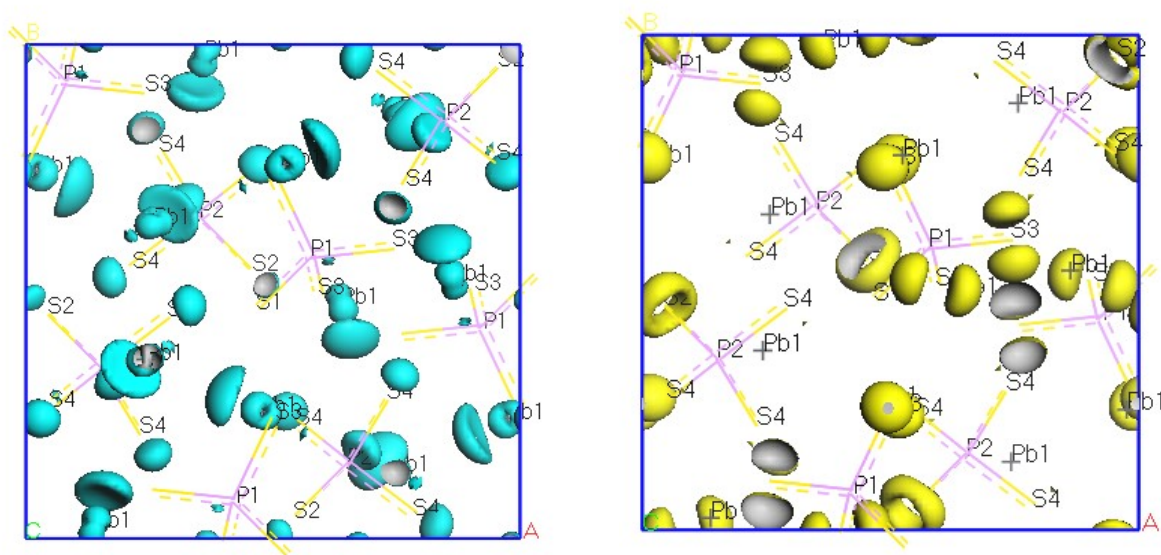

**Figure S3.** Calculated charge density of the bottom of conduction band (left) and the top of the valence band (right).

## References

1. Bruker APEX2; Bruker AXS Inc.: Madison, WI, 2005.
2. G. M. Sheldrick, A short history of *SHELX*, *Acta Crystallogr., Sect. A: Found. Crystallogr.*, 2008, **64**, 112–122.
3. E. Parthé and L. M. Gelato, The standardization of inorganic crystal-structure data, *Acta Crystallogr., Sect. A: Found. Crystallogr.*, 1984, **40**, 169–183.
